# Supplementary material for: SYVN1 ubiquitinates FoxO1 to induce β-catenin nuclear translocation, PD-L1-mediated metastasis, and immune evasion of hepatocellular carcinoma
Source: Springer Nature journal article supplement (doi:10.1007/s13402-023-00811-y), 2023-04-26
Supplement: MOESM1 [file 25285440]

# Supplementary materials

## 1、Figures and Figure legends

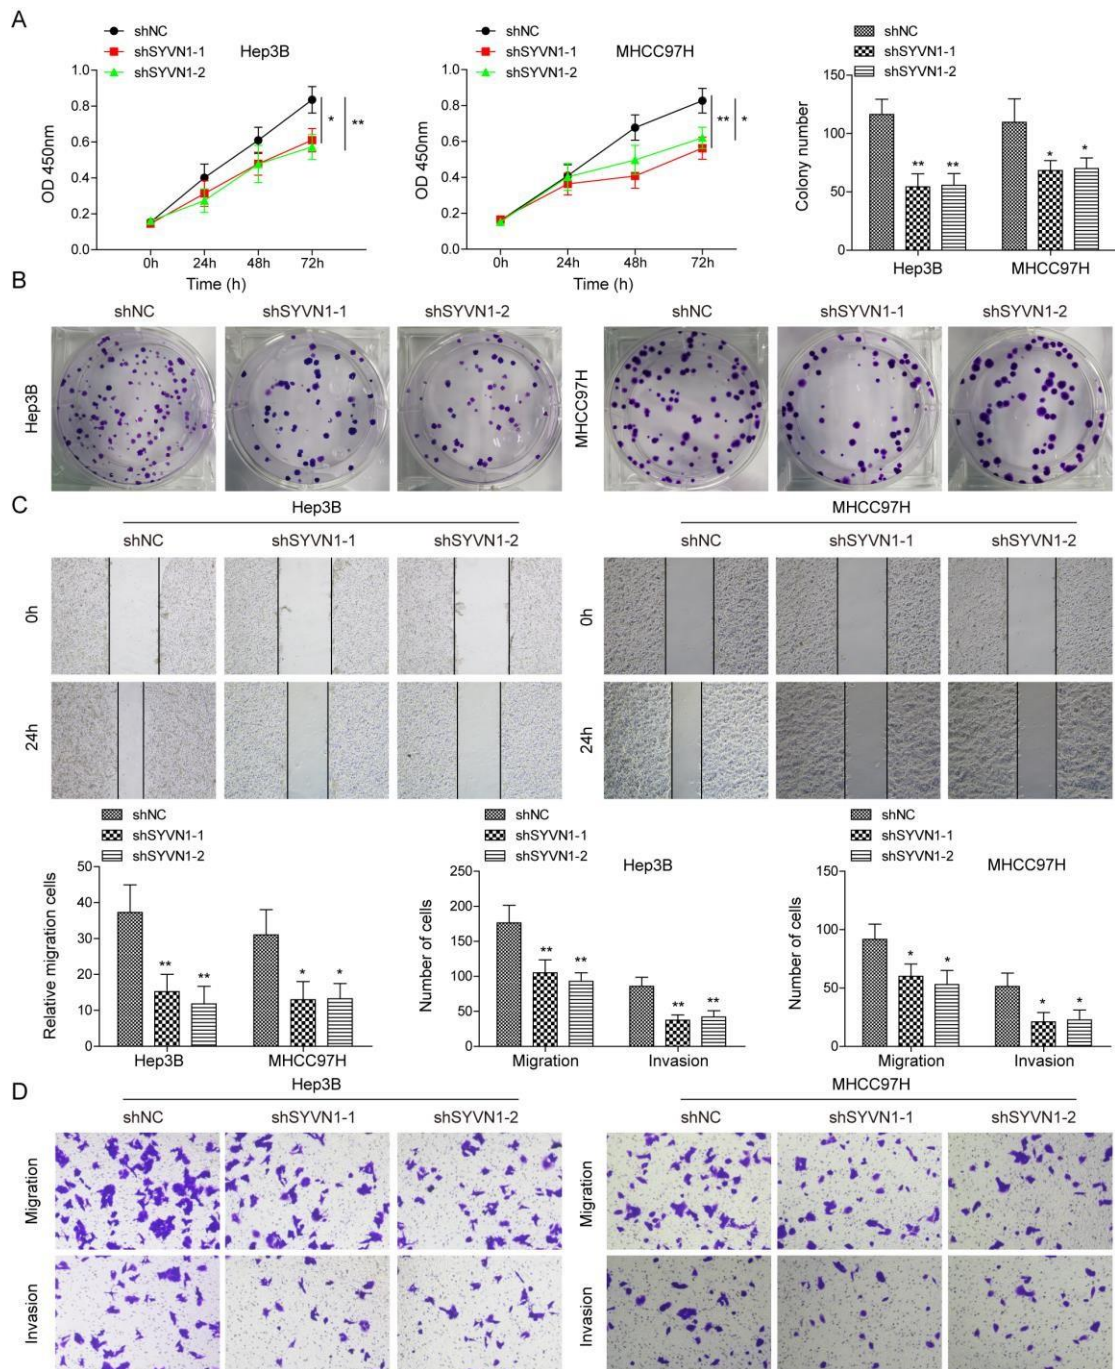

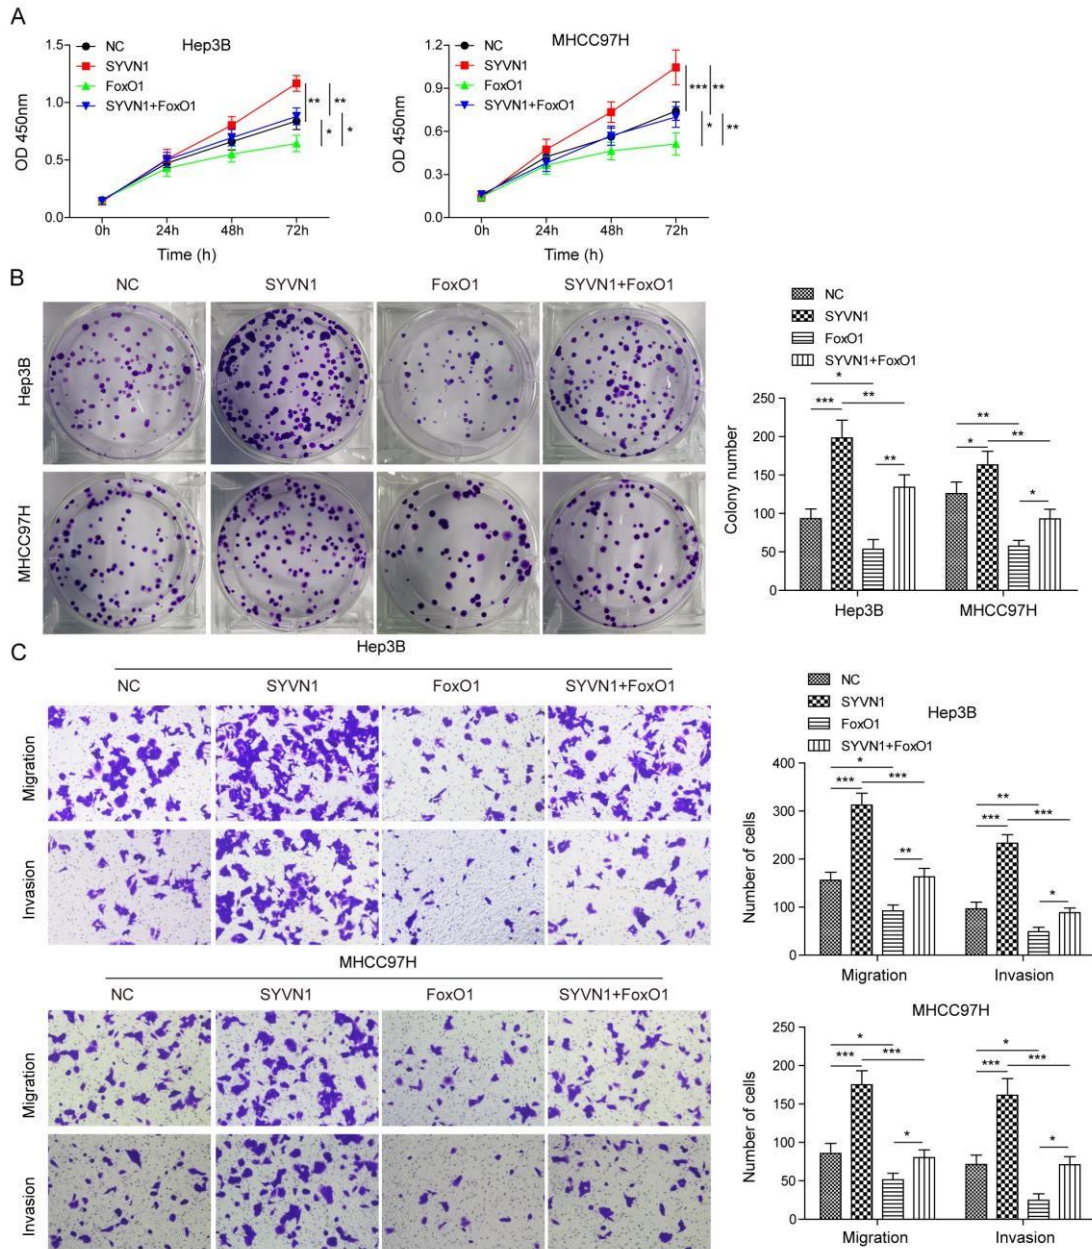



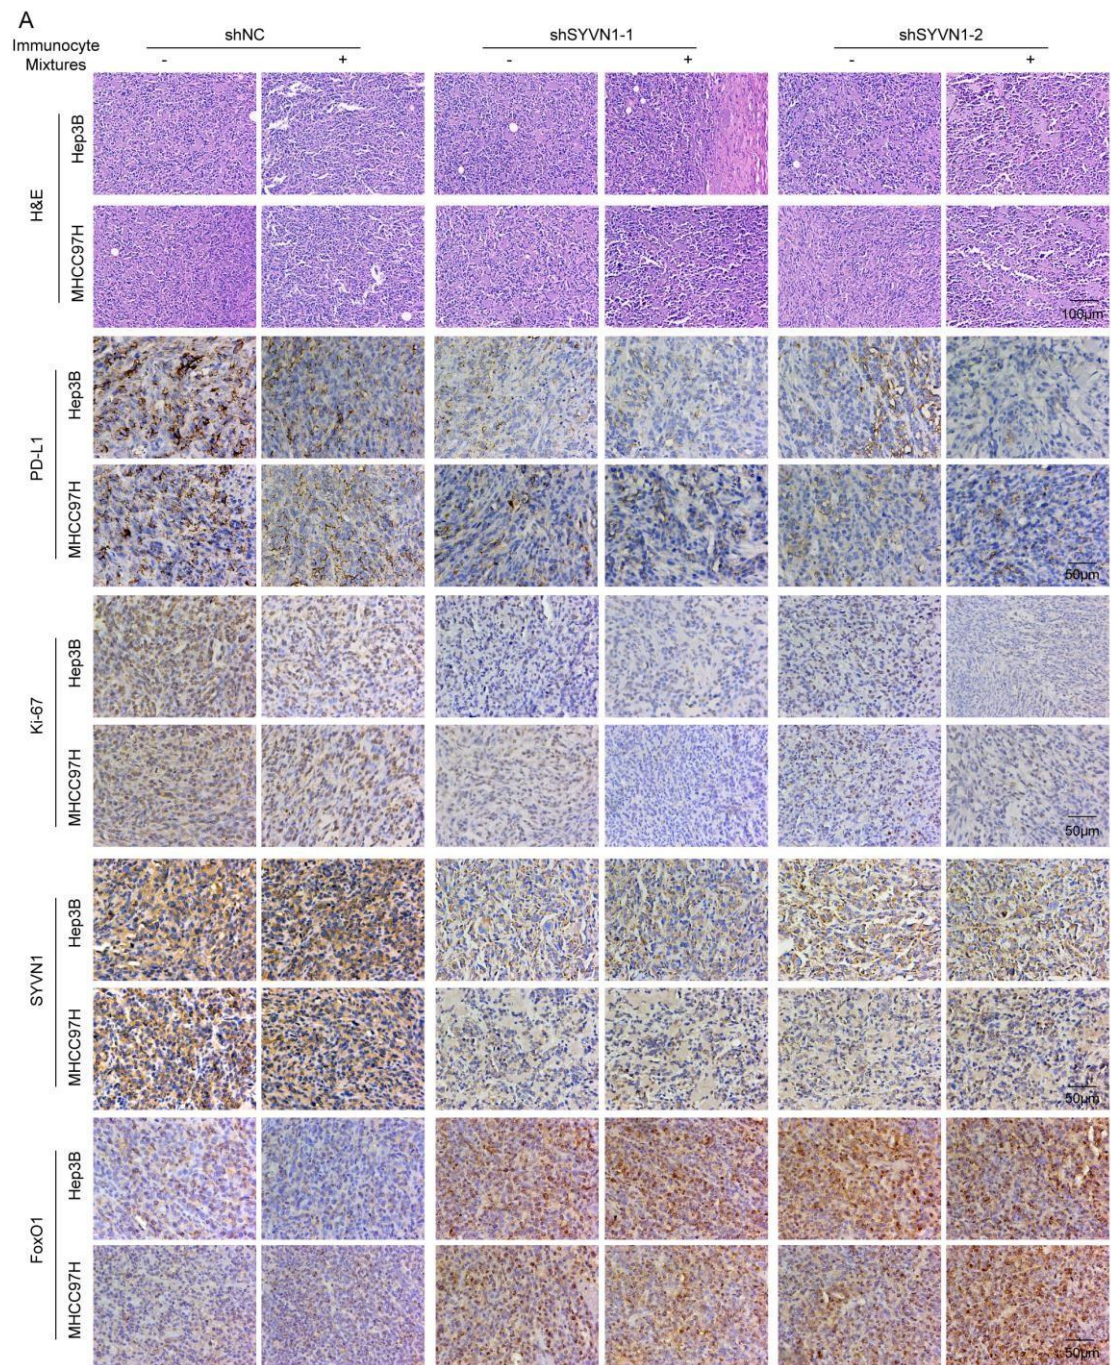

**Supplementary Figure 3. Silencing of SYVN1 inhibits immune escape of HCC cells *in vivo*.** NOD/SCID mice were subcutaneously injected with stably transfected HCC cells to establish xenograft model. (A) Representative images of H&E staining on tumor sections. Scar bar = 100  $\mu$ m. Expression of PD-L1, Ki-67, SYVN1 and FoxO1 in tumors was detected by immunohistochemistry staining. Scar bar = 50  $\mu$ m.

## 2、 Supplementary Tables and Table legends

**Supplementary Table 1** The primers used in the RT-qPCR.

| Primer           | Sequence 5'-3'         |
|------------------|------------------------|
| SYVN1 sense      | CTTCGTCAGCCACGCTTATC   |
| SYVN1 anti-sense | CCACGGAGTGCAGCACATAC   |
| FoxO1 sense      | CAGCAAATCAAGTTATGGAGGA |
| FoxO1 anti-sense | TATCATTGTGGGGAGGAGAGTC |
| GAPDH sense      | CGCTCTCTGCTCCTCCTGTTC  |
| GAPDH anti-sense | ATCCGTTGACTCCGACCTTCAC |

**Supplementary Table 2** Antibodies used in this study.

| Antibody  | Vendor | Catalog no. | Working dilution                         |
|-----------|--------|-------------|------------------------------------------|
| SYVN1     | Abcam  | ab170901    | WB (1:1000); IP (1 µg);<br>IHC (1:100)   |
| PD-L1     | Abcam  | ab205921    | WB (1:1000); IF (1:200);<br>IHC (1:200)  |
| β-catenin | Abcam  | ab32572     | WB (1:2000); ChIP (1 µg)                 |
| FoxO1     | Abcam  | ab39670     | WB (1:1000); ChIP (1 µg);<br>IHC (1:100) |
| Myc       | Abcam  | ab32        | WB (1:1000)                              |
| Flag      | Abcam  | ab205606    | WB (1:2000)                              |
| HA        | Abcam  | ab9110      | WB (1:2000)                              |
| Ki-67     | Abcam  | ab15580     | IHC (1:200)                              |
| β-actin   | Abcam  | ab8226      | WB (1:2000)                              |

**Supplementary Table 3** Correlation between SYVN1 and clinicopathological features in 30 HCC patients

| Variable                               | SYVN1 |      | p value        |
|----------------------------------------|-------|------|----------------|
|                                        | Low   | High |                |
| <b>Age (years)</b>                     |       |      | 0.7152         |
| ≤50                                    | 7     | 9    |                |
| > 50                                   | 8     | 6    |                |
| <b>Sex</b>                             |       |      | 0.4621         |
| Female                                 | 5     | 8    |                |
| Male                                   | 10    | 7    |                |
| <b>HBsAg</b>                           |       |      | 0.6999         |
| Negative                               | 6     | 4    |                |
| Positive                               | 9     | 11   |                |
| <b>Liver cirrhosis</b>                 |       |      | 0.7104         |
| No                                     | 8     | 10   |                |
| Yes                                    | 7     | 5    |                |
| <b>Serum AFP, ng/mL</b>                |       |      | 0.2635         |
| ≤20                                    | 11    | 7    |                |
| > 20                                   | 4     | 8    |                |
| <b>Serum ALT, U/L</b>                  |       |      | 0.2451         |
| ≤75                                    | 8     | 12   |                |
| > 75                                   | 7     | 3    |                |
| <b>Tumor size<br/>(diameter, cm)</b>   |       |      | <b>0.0253*</b> |
| ≤5                                     | 10    | 3    |                |
| > 5                                    | 5     | 12   |                |
| <b>NK cell proportion in<br/>blood</b> |       |      | <b>0.0209*</b> |
| ≤8%                                    | 6     | 13   |                |
| > 8%                                   | 9     | 2    |                |
| <b>Microvascular invasion</b>          |       |      | <b>0.0142*</b> |
| No                                     | 8     | 1    |                |
| Yes                                    | 7     | 14   |                |
| <b>Tumor number</b>                    |       |      | 0.4497         |
| Single                                 | 4     | 7    |                |
| Multiple                               | 11    | 8    |                |
| <b>TNM</b>                             |       |      | 0.4661         |
| I/II                                   | 9     | 6    |                |
| III/IV                                 | 6     | 9    |                |
